# Supplementary material for: Effect of occupational exposure of dentists and healthcare personnel to electromagnetic fields on telomere length and DNA damage
Source: Research Square preprint supplement (doi:10.21203/rs.3.rs-7300847/v1), 2025-09-17
Supplement: Supplementary file 1 [file b7909203a4c68da7ac646775.docx]

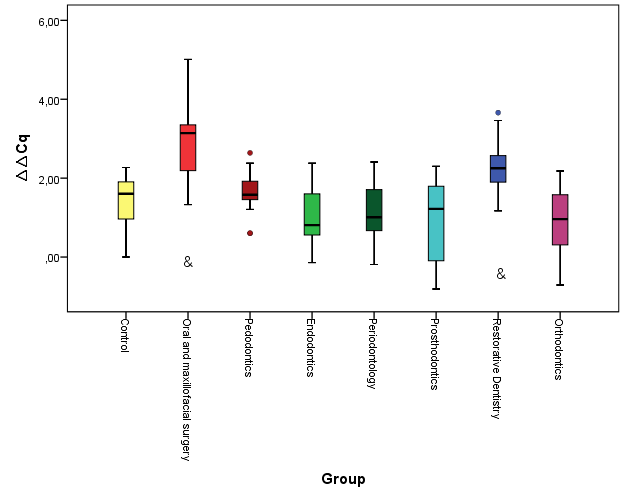


**Graph 1.** Box plots showing the distribution of the ∆∆Cq parameter in the groups. The value of telomere length was calculated from ΔΔCq. &p < 0.001 significant difference compared to the control group.


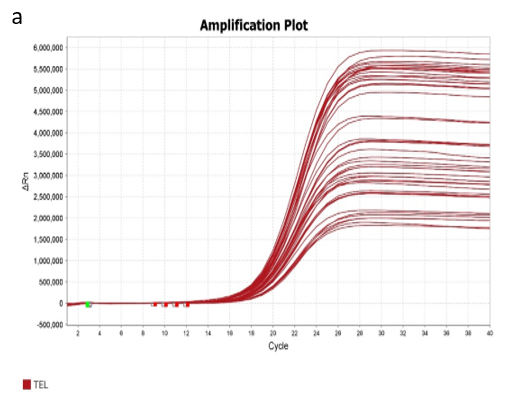


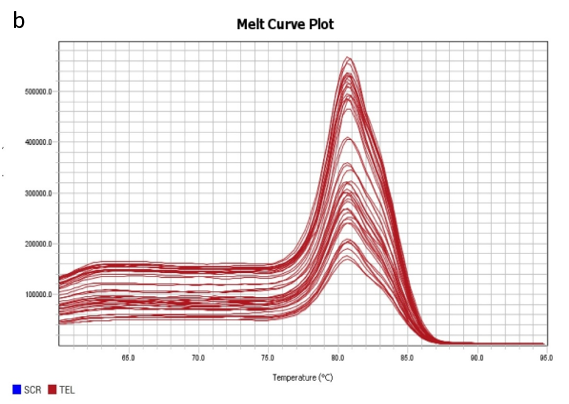


**Graph 2.** Real-Time PCR reaction performed using telomere primers a) Amplification, b) Melting curve graph


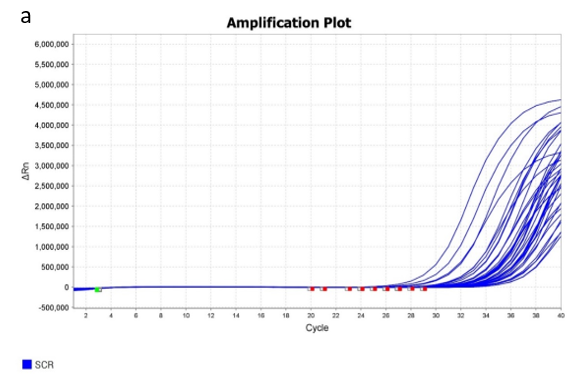


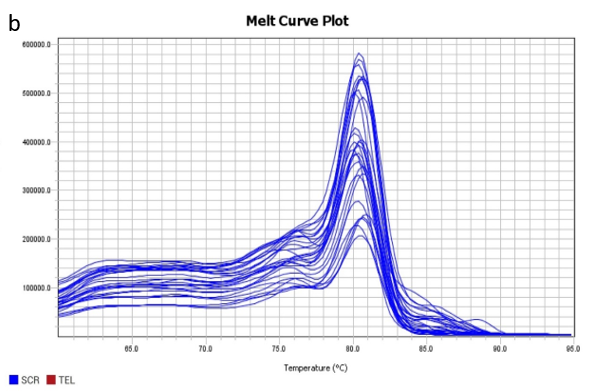


**Graph 3.** Real-Time PCR reaction performed using SCR primers a) Amplification, b) Melting curve graph


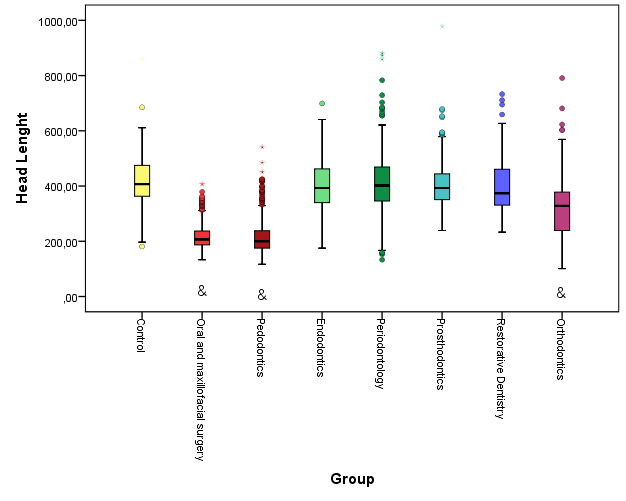


**Graph 4.** Box plots showing the distribution of head length values in the groups. &p < 0.001 significant difference compared to the control group.


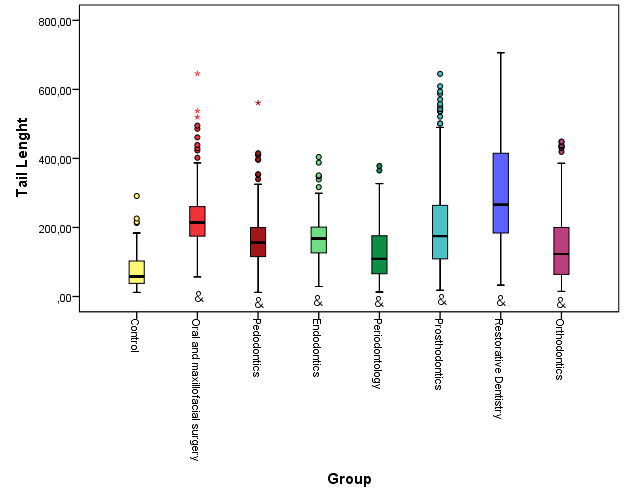


**Graph 5.** Box plots showing the distribution of tail length values in the groups. &p < 0.001 significant difference compared to the control group.


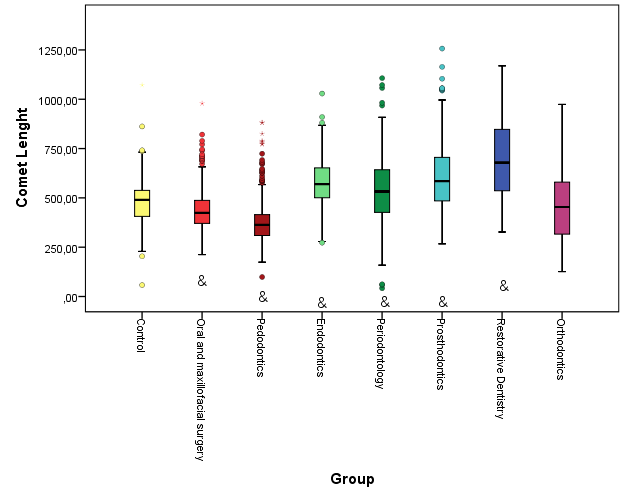


**Graph 6.** Box plots showing the distribution of comet length values in the groups. &p < 0.001 significant difference compared to the control group.


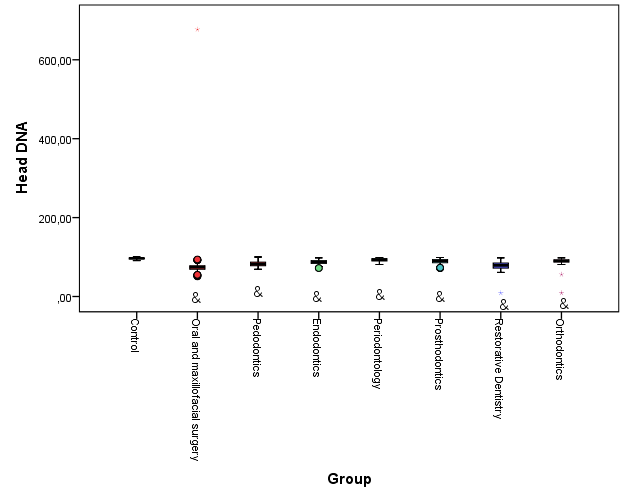


**Graph 7.** Box plots showing the distribution of head DNA values in the groups. &p < 0.001 significant difference compared to the control group.


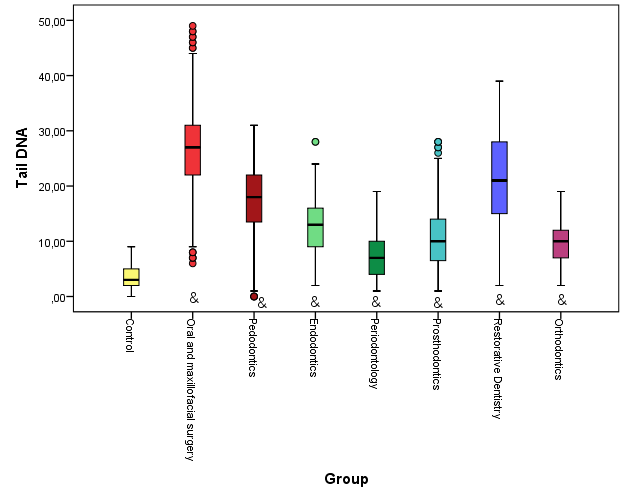


**Graph 8.** Box plots showing the distribution of tail DNA values in the groups. &p < 0.001 significant difference compared to the control group.


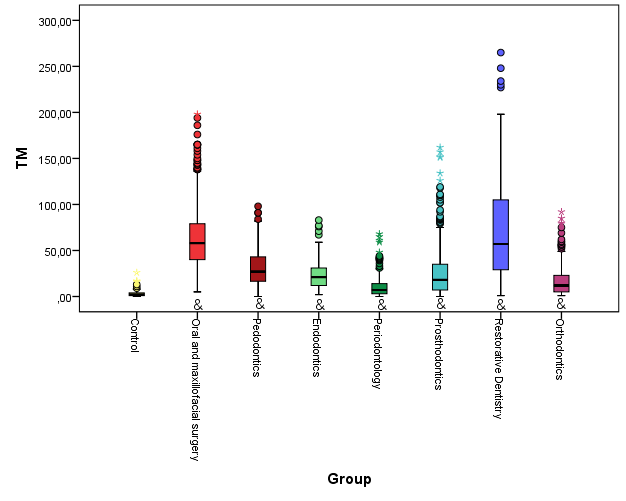


**Graph 9.** Box plots showing the distribution of TM (tail moment) values in the groups. &p < 0.001 significant difference compared to the control group.


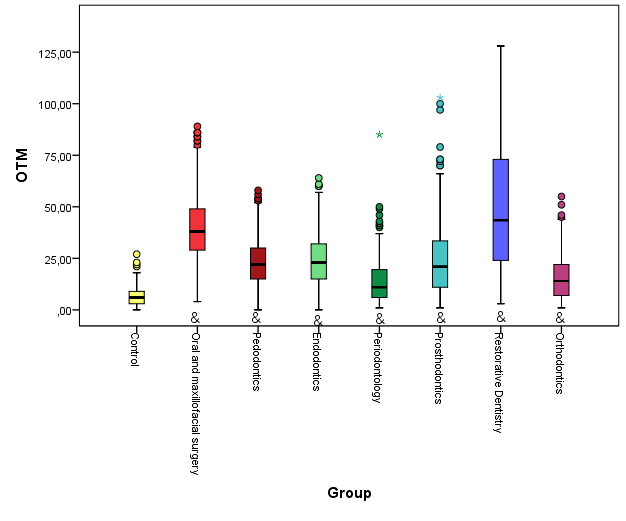


**Graph 10.** Box plots showing the distribution of OTM (olive tail moment) values in the groups. &p < 0.001 significant difference compared to the control group.
